# Supplementary material
Source: publisher figshare collection journal article supplement (https://frontiersin.figshare.com/ndownloader/files/30748567)
Supplement: Supplementary file [file 30748567]

**Supplementary Figure S1. Sensitivity analysis of duration of analgesia**

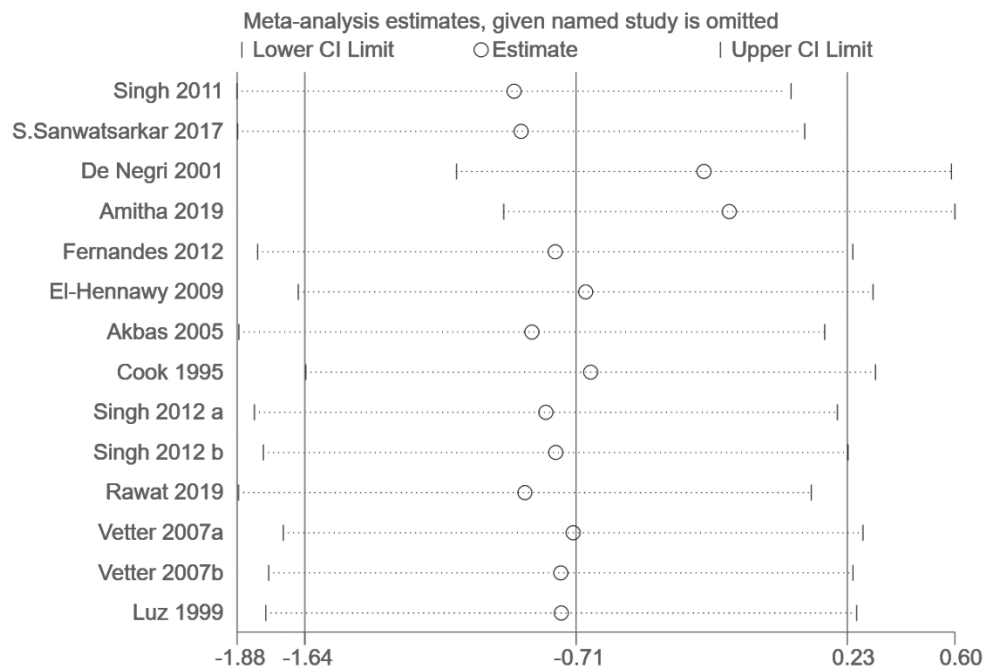

**Supplementary Figure S2.** Sensitivity analysis of pain score

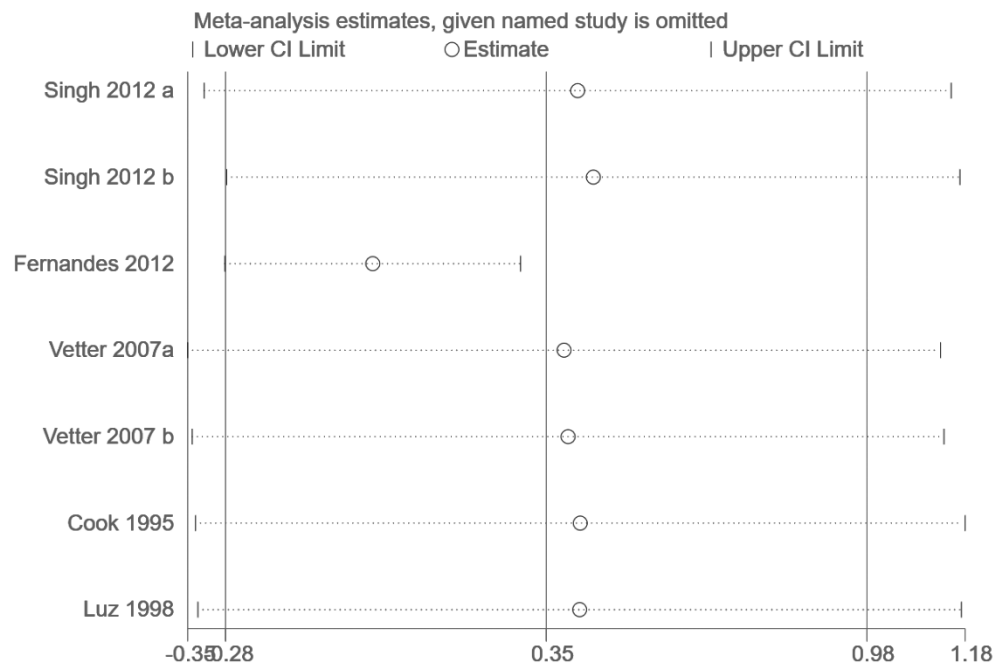

**Supplementary Figure S3. Sensitivity analysis of complications**

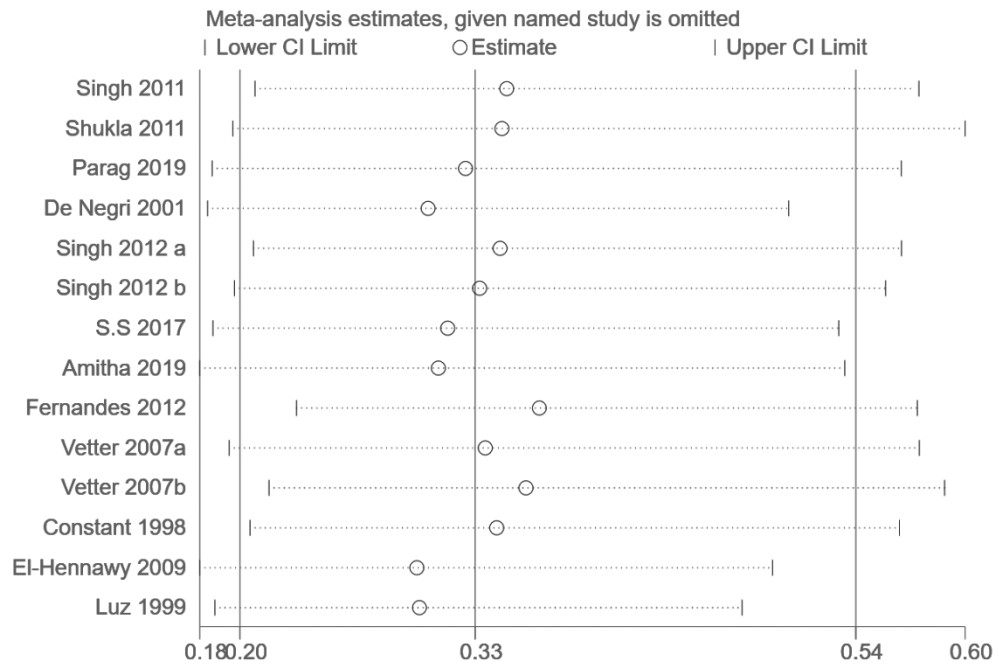

**Supplementary Figure S4.** Trim and fill of duration of analgesia

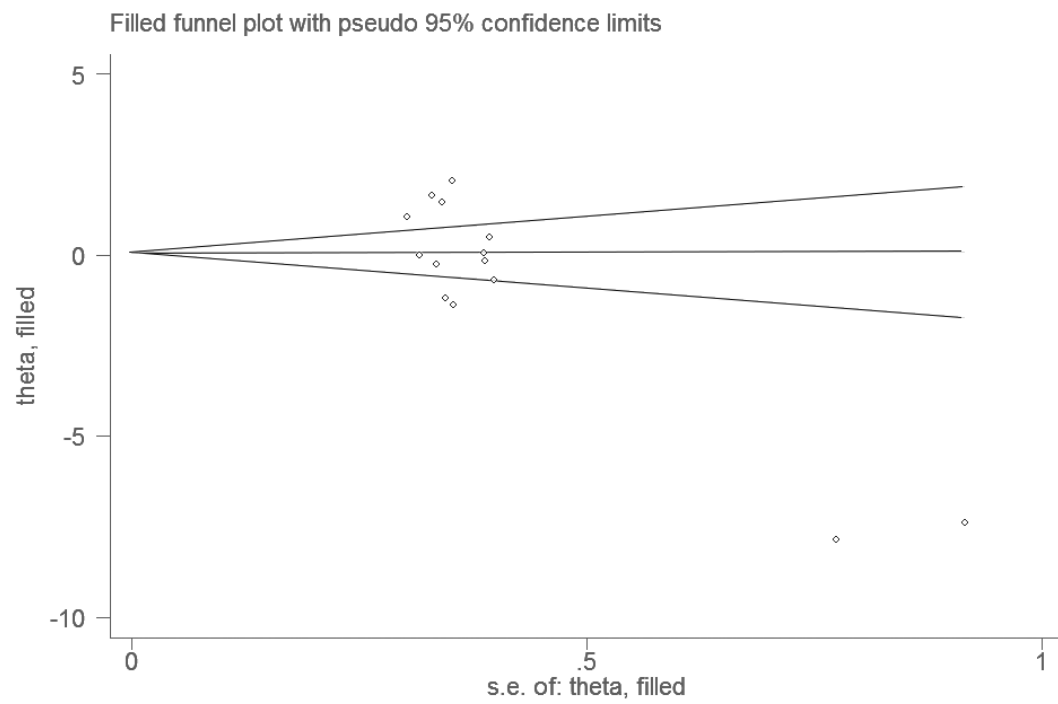

**Supplementary Table S1.** Rob2 quality assessment for RCTs

| <b>Study</b>          | <b>Bias arising from the randomization process</b> | <b>Bias due to deviations from intended interventions</b> | <b>Bias due to missing outcome data</b> | <b>Bias in measurement of the outcome</b> | <b>Bias in selection of the reported result</b> | <b>Overall bias</b> |
|-----------------------|----------------------------------------------------|-----------------------------------------------------------|-----------------------------------------|-------------------------------------------|-------------------------------------------------|---------------------|
| Akbas 2005 (24)       | Unclear                                            | Unclear                                                   | Low                                     | Low                                       | Low                                             | Unclear             |
| Amitha 2019 (25)      | Unclear                                            | Unclear                                                   | Low                                     | Low                                       | Low                                             | Unclear             |
| Constant 1998 (29)    | Unclear                                            | Low                                                       | Low                                     | Low                                       | Low                                             | Low                 |
| Cook 1995 (26)        | Low                                                | Unclear                                                   | Low                                     | Low                                       | Low                                             | Low                 |
| De Negri 2001 (30)    | Low                                                | Low                                                       | Low                                     | Low                                       | Low                                             | Low                 |
| El-Hennawy 2009 (19)  | Low                                                | Low                                                       | Low                                     | Low                                       | Low                                             | Low                 |
| Fernandes 2012 (32)   | Low                                                | Unclear                                                   | Low                                     | Low                                       | Low                                             | Low                 |
| Luz 1999 (27)         | Unclear                                            | High                                                      | Low                                     | Low                                       | Low                                             | High                |
| Parag 2019 (35)       | Unclear                                            | Unclear                                                   | Low                                     | Low                                       | Low                                             | Unclear             |
| Rawat 2019 (34)       | Low                                                | Low                                                       | Low                                     | Low                                       | Low                                             | Low                 |
| Sanwatsarkar 2017 (9) | Low                                                | Low                                                       | Low                                     | Low                                       | Low                                             | Low                 |
| Shukla 2011 (38)      | Low                                                | Low                                                       | Low                                     | Low                                       | Low                                             | Low                 |
| Singh 2012 (28)       | Unclear                                            | Low                                                       | Low                                     | Low                                       | Low                                             | Low                 |
| Singh 2011 (33)       | Low                                                | Low                                                       | Low                                     | Low                                       | Low                                             | Low                 |
| Vetter 2007 (6)       | Low                                                | Low                                                       | Low                                     | Low                                       | Low                                             | Low                 |

Supplementary Table S2. GRADE for each outcome

Title: Clonidine compared to Bupivacaine or Ropivacaine for local anesthetics in caudal block for postoperative analgesia in pediatric surgery

| Certainty assessment                          |                   |              |               |              |             |                                     | № of patients  |                            | Effect                             |                                                          | Certainty     | Importance |
|-----------------------------------------------|-------------------|--------------|---------------|--------------|-------------|-------------------------------------|----------------|----------------------------|------------------------------------|----------------------------------------------------------|---------------|------------|
| № of studies                                  | Study design      | Risk of bias | Inconsistency | Indirectness | Imprecision | Other considerations                | Clonidine      | Bupivacaine or Ropivacaine | Relative (95% CI)                  | Absolute (95% CI)                                        |               |            |
| Pain score (assessed with: FLACC Pain Scale ) |                   |              |               |              |             |                                     |                |                            |                                    |                                                          |               |            |
| 7                                             | randomised trials | not serious  | not serious   | serious      | not serious | publication bias strongly suspected | 98             | 138                        | -                                  | SMD <b>0.354 SD higher</b> (0.276 lower to 0.983 higher) | ⊕⊕⊕○ MODERATE | CRITICAL   |
| Duration of analgesia (assessed with: min)    |                   |              |               |              |             |                                     |                |                            |                                    |                                                          |               |            |
| 14                                            | randomised trials | not serious  | not serious   | not serious  | not serious | publication bias strongly suspected | 265            | 284                        | -                                  | SMD <b>0.71 SD lower</b> (1.644 lower to 0.225 higher)   | ⊕⊕⊕○ MODERATE | CRITICAL   |
| Post-requirement                              |                   |              |               |              |             |                                     |                |                            |                                    |                                                          |               |            |
| 3                                             | randomised trials | not serious  | not serious   | not serious  | not serious | none                                | 45/75 (60.0%)  | 13/75 (17.3%)              | <b>OR 8.771</b> (0.696 to 110.577) | <b>474 more per 1,000</b> (from 46 fewer to 785 more)    | ⊕⊕⊕⊕ HIGH     | IMPORTANT  |
| Complications                                 |                   |              |               |              |             |                                     |                |                            |                                    |                                                          |               |            |
| 14                                            | randomised trials | not serious  | not serious   | not serious  | not serious | publication bias strongly suspected | 62/277 (22.4%) | 122/208 (58.7%)            | <b>OR 0.331</b> (0.205 to 0.536)   | <b>267 fewer per 1,000</b> (from 361 fewer to 155 fewer) | ⊕⊕⊕○ MODERATE | IMPORTANT  |

CI: Confidence interval; SMD: Standardised mean difference; OR: Odds ratio
